# Supplementary material
Source: Elsevier journal article supplement (https://www.sciencedirect.com/science/article/pii/S2341287918302230)
Supplement: mmc1 [file S2341287918302230:mmc1.docx]

**Heterogeneidad de criterios en el diagnóstico de bronquiolitis aguda en España**

**MATERIAL SUPLEMENTARIO ON-LINE**

**ÍNDICE**

**Métodos (Descripción completa)**

**Estudio Delphi (consenso de expertos)**

**Estudio transversal (opinión de pediatras clínicos)**

**Tabla S1. Guías y publicaciones revisadas para elaborar los cuestionarios**

**Tabla S2. Identificación de expertos para el estudio Delphi**

**Tabla S3. Estudio Delphi-Encuesta a expertos. Preguntas y opciones de respuesta**

**Tabla S4. Encuesta on-line. Preguntas y opciones de respuesta**

**Tabla S5. Sociedades científicas pediátricas colaboradoras**

**Tabla S6. Criterios para asignar el cumplimiento de criterios diagnósticos (McConnochie, NICE y Expertos Españoles)**

**Resultados (Datos Complementarios)**

**Tabla S7. Estudio Delphi. Datos demográficos de los expertos participantes**

**Tabla S8. Resultados completos de las dos rondas del estudio Delphi**

**Tabla S9.** Encuesta on-line. Diferencias en edad según respuestas

**Tabla S10. Coeficientes de correlación de las puntuaciones asignadas a cada signo/síntoma**

**Construcción del modelo factorial**

**MÉTODOS (DESCRIPCIÓN COMPLETA)**

Se realizaron dos estudios consecutivos. En un primer estudio se investigó si existía un consenso entre expertos españoles acerca del diagnóstico de la BA, por medio de un procedimiento Delphi. Posteriormente se realizó un estudio transversal mediante una encuesta on-line a pediatras españoles para conocer sus opiniones sobre el diagnóstico de la BA.

**Estudio Delphi (consenso de expertos).**

1) A partir de búsquedas en PubMed, GuiaSalud, Tripdatabase, National Institute for Health and Care Excellence y revisión de bibliografía de los documentos recuperados, se identificaron artículos de consenso, guías de práctica clínica y revisiones que incorporaban criterios diagnósticos, definiciones o descripciones estandarizadas de la BA. En la TABLA 1 se recogen los documentos revisados. A partir de ellos, se construyó el formulario para iniciar el método Delphi.

2) Formación de grupo de expertos. Mediante búsquedas libres en internet y búsquedas específicas en bases de datos bibliográficas se identificaron expertos españoles en la BA, definidos como personas que entre 2010 y 2016 hubieran publicado artículos originales o de revisión (se seleccionaba a los autores de referencia si eran más de dos) o hubieran participado en la elaboración de guías clínicas, hubieran sido docentes de cursos o hubieran presentado ponencias en congresos, todo ello referido a la BA. La TABLA 2 recoge las sintaxis de búsqueda utilizadas. Se intentó formar un grupo interdisciplinario abarcando a pediatras de atención primaria, pediatras generalistas de hospital, pediatras de servicios de urgencias, neumólogos pediatras, intensivistas pediátricos y neonatólogos, con una distribución geográfica lo más amplia posible.

3) Desarrollo del proceso. Con los expertos elegidos, se llevó a cabo un procedimiento de consenso mediante método Delphi. Se elaboró un cuestionario (TABLA 3) para recabar sus opiniones acerca de los criterios de diagnóstico propuestos en la literatura. Había preguntas dicotómicas (si/no), de opción múltiple, y otras para valorar de cero a diez la importancia de una característica clínica para el diagnóstico. Los encuestados podían proponer nuevos ítems. Se organizaron rondas sucesivas en las que las respuestas iniciales se procesaron y re-enviaron a los participantes, junto al sumario de las opiniones de todos los expertos y los nuevos ítems propuestos. Cada participante pudo cambiar o mantener su valoración. Los criterios de consenso establecidos a priori fueron: una opción obtiene ≥ 75% de respuestas válidas favorables, y en variables cuantitativas (rango de valores de 0 a 10) si percentil 25 es ≥ 8 (factor importante para el diagnóstico) o si percentil 75 es ≤ 2 (factor de nula importancia para el diagnóstico). Para decidir el número de rondas a realizar, se estableció que las rondas finalizarían cuando no hubiera un cambio significativo hacia el consenso (p<0.05 en pruebas χ2 o prueba de signos de Wilcoxon) respecto a la ronda anterior en ninguno de los ítems que permanecieran sin consensuar.

4) Análisis. Se hizo un análisis descriptivo de los resultados, identificando los ítems en los que se alcanzaba el acuerdo según el criterio definido.

**Estudio transversal. Opinión de los pediatras clínicos.**

1) Elaboración de la encuesta. Se construyó una encuesta similar a la utilizada en el estudio Delphi, resumiéndola a aspectos clave para facilitar su respuesta (TABLA 4).

2) Aplicación de la encuesta. Con la colaboración de varias sociedades científicas pediátricas españolas (TABLA 5), se informó mediante correo electrónico del proyecto a sus socios, invitándoles a participar en una encuesta on-line. Como estímulo, se anunció el sorteo, entre todos los participantes, de la inscripción a un congreso de la Asociación Española de Pediatría. La encuesta permaneció activa desde mediados de noviembre de 2017 hasta enero de 2018.

3) Tamaño de la muestra. Es imposible conocer con certeza el número de pediatras con ejercicio activo en España. Las bases de datos de las sociedades científicas contienen errores, duplicados y direcciones de correo inválidas. Muchos pediatras pueden haber recibido la invitación a participar desde varias sociedades científicas. Asumiendo el desconocimiento de la base poblacional, se hizo un cálculo aproximado del tamaño muestral necesario, basado en la estimación de que en España puede haber hasta 10000 pediatras (Barber Pérez P, González López-Valcárcel B, Suárez Vega R. Oferta y necesidad de especialistas médicos en España (2010-2025). Universidad de Las Palmas de Gran Canaria, 2011. Disponible en: https://www.msssi.gob.es/profesionales/formacion/necesidadEspecialistas/home.htm). Bajo el supuesto de máxima indeterminación, un nivel de confianza del 95% y una precisión en la estimación de un 3%, el tamaño muestral necesario sería de 965.

4) Análisis. Se realizó un análisis descriptivo de los ítems de la encuesta y se investigó la asociación entre las respuestas a cada ítem y factores demográficos como edad, género, lugar de residencia y tipo de actividad profesional principal con pruebas χ2, Mann-Whitney y coeficientes de correlación de Spearman. Con criterios definidos (TABLA 6) se identificaron las respuestas coincidentes con dos de las definiciones más utilizadas: McConnochie (McConnochie KM. Bronchiolitis. What's in the name? Am J Dis Child 1983;137:11-3), NICE (National Institute for Health and Care Excellence. Bronchiolitis in children: diagnosis and management. NICE Guideline. 1 June 2015. www.nice.org.uk/guidance/ng9 .) y el consenso de expertos alcanzado en el estudio Delphi inicial. Se investigó si era posible reducir las variables estudiadas a un conjunto menor de parámetros mediante un análisis factorial, extrayendo factores mediante el método de componentes principales (ver detalles de la construcción del modelo factorial más adelante, en Resultados Complementarios, en este Anexo). Para cada factor identificado se asignó una puntuación factorial a cada uno de los encuestados, y se analizó si había diferencias en esas puntuaciones factoriales en función de las variables demográficas antes mencionadas, mediante pruebas Kruskal-Wallis y coeficientes de correlación de Spearman. En general, se consideraron estadísticamente significativas las diferencias con p<0,05.

El proyecto fue aprobado por el Comité Ético en Investigación del Área de Salud de Palencia, y financiado por la Fundación Ernesto Sánchez Villares (02/2017)

**TABLA S1. GUÍAS Y PUBLICACIONES REVISADAS PARA ELABORAR LOS CUESTIONARIOS**

| Engel S, Newns GH. Proliferative mural bronchiolitis. Arch Dis Child 1940;15:219-29.  Court SDM. The definition of acute respiratory illnesses in children. Postgrad Med J 1973;49:771-6.  McIntosh K. Bronchiolitis and asthma: possible common pathogenic pathways. J Allergy Clin Immunol 1976;57:595-604.  Wohl MEB, Chernick V. Bronchiolitis. Am Rev Respir Dis 1978;118:759-81.  Holt L E. The diseases of infancy and childhood. D. Appleton and Co., New York, 1901, p. 462.  McConnochie KM. Bronchiolitis. What's in the name? Am J Dis Child 1983;137:11-3.  Glezen WP, Taber LH, Frank AL, Kasel JA. Risk of primary infection and reinfection with respiratory syncitial virus. Am J Dis Child 1986;140:543-6.  Denny FW, Clyde WA. Acute lower respiratory tract infections in nonhospitalized children. *J Pediatr.* 1986;108:635-646.  Rakshi K, Couriel M. Management of acute bronchiolitis. Arch Dis Child 1994;71:463-9.  Lakhanpaul M, Armon K, Eccleston P, MacFaul R, Smith S, Vyas H, et al. An evidence-based guideline for the management of children presenting with acute breathing difficulty. Nottingham: University of Nottingham; 2002.  Viswanathan M, King VJ, Bordley C, Honeycutt AA, Wittenborn J, Jackman AM, et al. Management of bronchiolitis in infants and children. Rockville, MD: U.S.: Department of Health and Human Services, Agency for Healthcare Research and Quality; 2003. Report No.: 69.  Green RJ, Zar HJ, Jeena PM, Madhi SA, Lewis H. South African guideline for the diagnosis, management and prevention of acute viral bronchiolitis in children . S Afr Med J 2010;100:320-5.  Friedman JN, Rieder MJ, Walton JM, Canadian Paediatric Society Acute Care Committee and Drug Therapy and Hazardous Substances Committee. Bronchiolitis: Recommendations for diagnosis, monitoring and management of children one to 24 months of age. Paediatr Child Health 2014;19:485-91.  Baraldi E, Lanari M, Manzoni P, Rossi GA, Vandini S, Rimini A, et al. Inter-society consensus document on treatment and prevention of bronchiolitis in newborns and infants. Ital J Pediatr 2014;40:65.  Verstraete M, Cros P, Gouin M, Oillic H, Bihouée T, Denoual H, et al. Prise en charge de la bronchiolite aiguë du nourrisson de moins de 1 an: actualisation et consensus médical au sein des hôpitaux universitaires du Grand Ouest (HUGO). Arch Pediatr 2014;21:53-62.  Ralston SL, Lieberthal AS, Meissner HC, Alverson BK, Baley JE, Gadomski AM, et al. Clinical practice guideline: the diagnosis, management, and prevention of bronchiolitis. Pediatrics 2014;134:e1474-e1502.  Mecklin M, Hesselmar B, Qvist E, Wennergren G, Korppi M. Diagnosis and treatment of bronchiolitis in Finnish and Swedish children's hospitals. Acta Pædiatr 2014;103:946-50.  National Institute for Health and Care Excellence. Bronchiolitis in children: diagnosis and management. NICE Guideline. 1 June 2015. www.nice.org.uk/guidance/ng9.  Korppi M. Virus-induced wheezing in infants aged 12–24 months and bronchiolitis in infants under 6 months are different clinical entities. Acta Pædiatr 2015;104:e539.  Korppi M. Bronchiolitis: the disease of <6-monthold, <12-month-old or <24-month-old Infants. Pediatr Infect Dis J 2015;34:799-800.  Tapiainen T, Aittoniemi J, Immonsen J, Jylkkä H, Meinander T, Nuolivirta K, et al. Finnish guidelines for the treatment of laryngitis, wheezing bronchitis and bronchiolitis in children. Acta Pædiatr 2016;105:44-9. |
| --- |

**TABLA S2. IDENTIFICACIÓN DE EXPERTOS PARA EL ESTUDIO DELPHI**

| Mediante búsquedas libres en internet, búsquedas específicas en bases de datos bibliográficas (PubMed, Índice Médico Español, IBECS) y búsquedas en el portal español de Guías Clínicas, se identificaron expertos españoles en la bronquiolitis, definidos como personas que entre 2010 y 2016 hubieran publicado artículos originales o de revisión (se seleccionaba a los primeros autores) o hubieran participado en la elaboración de guías clínicas, hubieran sido docentes de cursos o hubieran presentado ponencias en congresos, todo ello referido a la BA.  La sintaxis de búsqueda en las diferentes bases de datos fue:  **1) PubMed** (https://www.ncbi.nlm.nih.gov/pubmed/).  ("Bronchiolitis, Viral"[Mesh] OR bronchiolitis[Text Word]) AND ("2010"[Date - Publication] : "3000"[Date - Publication]) AND (Spain[Text Word])  Resultados = 41.  **2) Índice Médico Español** (http://bddoc.csic.es:8080/inicioBuscarSimple.html?tabla=docu&bd=IME)  “bronquiolitis” en búsqueda simple, seleccionando posteriormente los publicados en 2010 y posteriormente.  Resultados=7.  **3) IBECS** (http://ibecs.isciii.es/cgi-bin/wxislind.exe/iah/online/?IsisScript=iah/iah.xis&base=IBECS&lang=e)  "BRONQUIOLITIS" [Descriptor de asunto] and "ESPANA/2010" or "ESPANA/2011" or "ESPANA/2012" or "ESPANA/2013" or "ESPANA/2014" or "ESPANA/2015" or "ESPANA/2016" or "ESPANA/2017" [País, año de publicación]  Resultados=77  **4) Guiasalud** (http://portal.guiasalud.es/web/guest/catalogo-gpc)  La única GUÍA que aparece publicada a partir de 2010 es:  Guía de Práctica Clínica sobre Bronquiolitis Aguda  Situación: Caducada  Fecha de edición: 31/12/2010  Entidades elaboradoras: Fundació Sant Joan de Déu. Agència d’Avaluació de Tecnologia i Recerca Mèdiques (AATRM) de Cataluña  **5) Webs de sociedades científicas pediátricas españolas**  Se localizaron guías o protocolos de la bronquiolitis en dos sociedades científicas::  SECIP (Sociedad Española de Cuidados Intensivos Pediátricos) https://www.secip.com/  AEPap (Asociación Española de Pediatría de Atención Primaria) http://www.aepap.org/  **6) Google**  Páginas en España localizadas con la combinación de búsqueda (bronquiolitis congreso OR reunion OR curso). |
| --- |

**TABLA S3. ESTUDIO DELPHI - ENCUESTA A EXPERTOS. PREGUNTAS Y OPCIONES DE RESPUESTA**

| - Tipo de actividad profesional principal: Pediatra de atención primaria o consulta de pediatría general extrahospitalaria/ Neonatología / Urgencias Pediátricas / Neumología o Neumoalergia pediátricas / Cuidados intensivos pediátricos / Hospitalización pediátrica general / Otra (especificar). - Comunidad autónoma donde ejerce. - Género: Varón / Mujer. - Edad (años cumplidos). - ¿Atiende a niños con bronquiolitis?: Bastantes veces / Ocasionalmente / Casi nunca. - ¿Hasta qué edad cree usted que es aceptable el diagnóstico de bronquiolitis?: 3 meses / 6 meses / 12 meses/18 meses / 24 meses / 36 meses / No hay un límite de edad. - ¿Cuál es la duración máxima que debe considerarse “normal” para una bronquiolitis?: Hasta 1 semana / Hasta 2 semanas / Hasta 3 semanas / Hasta 4 semanas / Más de 4 semanas / No hay límite. - ¿Cuántos episodios cree usted que pueden ser diagnosticados de bronquiolitis?: Solo el primer episodio / Los 2 primeros episodios / Los 3 primeros episodios / 4 o más episodios / No hay límite al número de episodios. - ¿En qué época del año cree usted que es aceptable un diagnóstico de bronquiolitis?: Solo en invierno / En otoño e invierno / En otoño, invierno y primavera / En invierno y primavera / En cualquier momento del año. - ¿Cree que realmente existe la bronquiolitis como una enfermedad específica?: Sí, con seguridad / Sí, probablemente / No estoy seguro-a / No, con seguridad. - ¿Qué importancia le da usted a cada uno de estos síntomas y signos para hacer un diagnóstico de bronquiolitis? Escala de 0 (ningún interés para el diagnóstico) a 10 (imprescindible para el diagnóstico): - Síntomas iniciales de rinitis / Tos / Fiebre > 38º / Aumento de frecuencia respiratoria / Sibilancias en la auscultación Crepitantes en la auscultación / Signos de dificultad respiratoria (tiraje, aleteo nasal,…) / Apneas / Mal estado general / Problemas con la alimentación (poco apetito, rechazo de tomas, vómitos,…) / Espiración prolongada (este último se añadió en la segunda ronda por sugerencia de un experto en la primera ronda). - Puede añadir otras manifestaciones clínicas que considere relevantes para el diagnóstico. - Para usted, la identificación de virus respiratorios causalmente relacionados con la bronquiolitis…: Apoya el diagnóstico / Es indiferente para el diagnóstico. - ¿Qué agentes infecciosos considera usted que son causantes de bronquiolitis? Respuestas si/no: Virus sincitial respiratorio / Rinovirus / Virus de la gripe / Metapneumovirus / Bocavirus / Parainfluenza / Coronavirus / Adenovirus / Enterovirus / Mycoplasma / Parechovirus (este último se añadió en la segunda ronda por sugerencia de un experto en la primera ronda). - Otros agentes que no están en la lista |
| --- |

**TABLA S4. ENCUESTA ON-LINE. PREGUNTAS Y OPCIONES DE RESPUESTA (en todos los campos se añadió opción No sabe/No contesta)**

| - Tipo de actividad profesional principal: Pediatra de Atención Primaria o consulta de Pediatría General Extrahospitalaria / Neumología o Neumoalergia pediátricas / Urgencias pediátricas / Neonatología / Cuidados intensivos pediátricos / Hospitalización pediátrica general / Residente de Pediatría / Otra (especificar). - Comunidad Autónoma en la que ejerce. - Edad (años cumplidos). - Género: Mujer / Varón. - ¿Atiendes a niños con bronquiolitis?: Bastantes veces / Ocasionalmente / Casi nunca. - ¿Hasta qué edad crees que es aceptable el diagnóstico de bronquiolitis?: 6 meses / 12 meses / 18 meses / 24 meses / 36 meses / Otra / No hay un límite de edad para el diagnóstico. - ¿Cuántos episodios crees que pueden ser diagnosticados de bronquiolitis?: Solo uno / Dos / Tres / Cuatro / No hay un límite de número de episodios. - ¿Es aceptable el diagnóstico de bronquiolitis en cualquier época del año?: Si / No. - ¿Crees que realmente existe la bronquiolitis como una enfermedad específica?: Si / No. - De las siguientes manifestaciones clínicas, ¿Cuales consideras más importantes para el diagnóstico de bronquiolitis? Escala de 0 (ningún interés para el diagnóstico) a 10 (imprescindible para el diagnóstico): Síntomas iniciales de rinitis / Tos / Sibilancias / Crepitantes / Signos de dificultad respiratoria (tiraje, aleteo nasal, …) / Aumento de la frecuencia respiratoria. - ¿Crees que la identificación de virus en muestras respiratorias es importante para realizar un diagnóstico de bronquiolitis?: Si / No. |
| --- |

**TABLA S5. SOCIEDADES CIENTÍFICAS PEDIÁTRICAS COLABORADORAS**

| Asociación Española de Pediatría  Asociación Española de Pediatría de Atención Primaria  Sociedad Española de Cuidados Intensivos Pediátricos  Sociedad Española de Infectología Pediátrica  Sociedad Española de Neonatología  Sociedad Española de Neumología Pediátrica  Sociedad Española de Pediatría Extrahospitalaria y de Atención Primaria  Sociedad Española de Pediatría Hospitalaria  Sociedad Española de Urgencias Pediátricas |
| --- |

**TABLA S6. CRITERIOS PARA ASIGNAR EL CUMPLIMIENTO DE CRITERIOS DIAGNÓSTICOS (McConnochie, NICE y Expertos Españoles)**

| Criterios McConnochie si:  - Diagnóstico posible hasta 24 meses, Y  - Solo el primer episodio, Y  - Sibilancias importantes para el diagnóstico (puntuación ≥ 8 sobre 10), Y  - Rinitis inicial importante para el diagnóstico (puntuación ≥ 8 sobre 10).  Criterios NICE si:  - Rinitis inicial importante para el diagnóstico (puntuación ≥ 8 sobre 10), Y  - Tos importante para el diagnóstico (puntuación ≥ 8 sobre 10), Y  - Aumento FR o Dificultad respiratoria importantes para el diagnóstico (puntuación ≥ 8 sobre 10), Y  - Sibilancias o crepitantes importantes para el diagnóstico (puntuación ≥ 8 sobre 10), Y  - Diagnóstico posible hasta 24 meses.  Criterios expertos españoles si:  - Solo el primer episodio, Y  - Diagnóstico posible en todas las estaciones, Y  - Identificar virus es importante para el diagnóstico, Y  - Aumento FR importante para el diagnóstico (puntuación ≥ 8 sobre 10), Y  - Dificultad respiratoria importante para el diagnóstico (puntuación ≥ 8 sobre 10). |
| --- |

FR: frecuencia respiratoria.

**RESULTADOS (DATOS COMPLEMENTARIOS)**

**Tabla S7. Estudio Delphi. Datos demográficos de los expertos participantes**

|  | Frecuencia | Porcentaje |
| --- | --- | --- |
| **CCAA** |  |  |
| Madrid | 7 | 17,5 |
| País Vasco | 7 | 17,5 |
| Andalucía | 6 | 15,0 |
| Asturias | 4 | 10,0 |
| Castilla y León | 4 | 10,0 |
| Cataluña | 4 | 10,0 |
| Comunidad Valenciana | 2 | 5,0 |
| Murcia | 2 | 5,0 |
| Canarias | 1 | 2,5 |
| Cantabria | 1 | 2,5 |
| Castilla-La Mancha | 1 | 2,5 |
| Galicia | 1 | 2,5 |
| **Subespecialidad** |  |  |
| Pediatría de Atención Primaria o consulta de Pediatría General | 12 | 30,0 |
| Hospitalización Pediátrica General | 8 | 20,0 |
| Neumología o Neumoalergia Pediátrica | 8 | 20,0 |
| Cuidados Intensivos Pediátricos | 7 | 17,5 |
| Urgencias Pediátricas | 2 | 5,0 |
| Neonatología | 1 | 2,5 |
| Otras | 2 | 5,0 |
| **Género** |  |  |
| Mujer | 16 | 40,0 |
| Hombre | 24 | 60,0 |
| **Edad**, años (mediana y IQR) | 53,0 (44,3-57,0) | |

CCAA: Comunidad Autónoma; IQR: rango intercuartil.

**TABLA S8. RESULTADOS COMPLETOS DE LAS DOS RONDAS DEL ESTUDIO DELPHI**

(continúa en la página siguiente)

| **VARIABLE** | **VALOR** | **RONDA 1** | **RONDA 2** | **CAMBIO (p)#** |
| --- | --- | --- | --- | --- |
| Edad límite para el diagnóstico | 6 meses | 7,5 | 2,7 | **0,046** |
|  | 12 meses | 45,0 | 51,4 |  |
|  | 18 meses | 7,5 | 0,0 |  |
|  | 24 meses | 40,0 | 45,9 |  |
| Número máximo de episodios aceptables | Solo uno | **84,6** | **83,8** | 0,999 |
|  | Dos | 7,7 | 2,7 |  |
|  | No hay un límite | 7,7 | 13,5 |  |
| Estación en que es aceptable el diagnóstico | Solo invierno | 5,0 | 2,7 | **0,004** |
|  | Invierno y primavera | 2,5 | 0,0 |  |
|  | Otoño e invierno | 15,0 | 5,4 |  |
|  | Otoño, invierno y primavera | 17,5 | 10,8 |  |
|  | Cualquier estación | 60,0 | **81,1** |  |
| Duración máxima del episodio | Hasta 1 semana | 10,0 | 0,0 | 0,317 |
|  | Hasta 2 semanas | 42,5 | 59,5 |  |
|  | Hasta 3 semanas | 25,0 | 24,3 |  |
|  | Hasta 4 semanas | 20,0 | 16,2 |  |
|  | No hay límite | 2,5 | 0,0 |  |
| Existe como una enfermedad específica | No, con seguridad | 7,5 | 8,1 | 0,705 |
|  | No estoy seguro | 10,0 | 2,7 |  |
|  | Sí, probablemente | 42,5 | 59,5 |  |
|  | Sí, con seguridad | 40,0 | 29,7 |  |
| Identificación de virus es importante para el diagnóstico | si | **75,0** | **78,4** | 0,317 |
| Agentes infecciosos responsables de BA |  |  |  |  |
| VSR | si | **100,0** | **100,0** | 1,000 |
| Rinovirus | si | **94,9** | **100,0** | 0,317 |
| Gripe | si | 71,4 | **77,8** | 0,083 |
| Metapneumovirus | si | **97,5** | **100,0** | 0,317 |
| Bocavirus | si | **89,2** | **94,3** | 0,157 |
| Parainfluenza | si | **89,2** | **85,0** | 0,083 |
| Coronavirus | si | **86,5** | **100,0** | 0,157 |
| Adenovirus | si | **87,2** | **100,0** | **0,046** |
| Enterovirus | si | 44,1 | 42,4 | 0,317 |
| Mycoplasma | si | 30,3 | **25,0** | 0,564 |
| Parechovirus   (Solo preguntado en 2ª vuelta) | si |  | 56,3 |  |

#: Prueba χ2.

continúa….

| **VARIABLE** | **VALOR** | **RONDA**  **1** | **RONDA**  **2** | **CAMBIO**  **(p)#** |
| --- | --- | --- | --- | --- |
| Importancia de signos/síntomas para el diagnóstico (escala 0-10) |  |  |  |  |
| Rinitis inicial | P25 | 5,0 | 6,8 | 0,083 |
|  | P75 | 8,0 | 8,0 |  |
| Tos | P25 | 7,0 | 7,8 | 0,376 |
|  | P75 | 8,8 | 8,0 |  |
| Fiebre | P25 | 2,0 | 1,8 | 0,454 |
|  | P75 | 6,0 | 6,0 |  |
| Aumento frecuencia respiratoria | P25 | **8,0** | **8,0** | 0,773 |
|  | P75 | 9,0 | 9,0 |  |
| Sibilancias | P25 | 7,0 | 6,8 | 0,317 |
|  | P75 | 9,0 | 9,0 |  |
| Crepitantes | P25 | 6,0 | 7,0 | 0,069 |
|  | P75 | 9,0 | 9,0 |  |
| Dificultad respiratoria | P25 | **8,0** | **8,0** | 0,163 |
|  | P75 | 9,0 | 9,0 |  |
| Espiración prolongada | P25 |  | 5,8 |  |
| (Solo preguntado en 2ª vuelta) | P75 |  | 8,0 |  |
| Apneas | P25 | 4,3 | 5,0 | 0,089 |
|  | P75 | 8,0 | 8,0 |  |
| Mal estado general | P25 | 2,0 | 2,0 | 0,444 |
|  | P75 | 6,0 | 6,0 |  |
| Dificultades alimentación | P25 | 5,0 | 5,0 | 0,431 |
|  | P75 | 7,0 | 7,0 |  |

#: Prueba de signos de Wilcoxon.

P25: Percentil 25; P%=: Percentil 50

Tabla S9. Encuesta on-line. Diferencias en edad según respuestas.

|  | No | Si | P# |
| --- | --- | --- | --- |
| Es posible más de un episodio | 38 (31-51) | 50 (37-58) | <0,001 |
| Diagnóstico en todas las estaciones | 51 (38-59) | 39 (32-52) | <0,001 |
| Diagnóstico aceptable después de los 12 meses | 48 (36-56) | 40 (32-53) | <0,001 |
| Existe como una enfermedad específica | 37 (30-51) | 43 (33-55) | <0,001 |
| Signos y síntomas importantes en el diagnóstico¶ |  |  |  |
| Rinitis inicial | 40 (32-53) | 47 (35-56) | <0,001 |
| Tos | 39 (31-54) | 43 (34-54) | 0,001 |
| Sibilancias | 40 (32-51) | 42 (33-55) | 0,020 |
| Crepitantes | 48 (35-57) | 38 (31-51) | <0,001 |
| Dificultad respiratoria | 43 (35-55) | 41 (32-54) | 0,011 |
| Aumento FR | 43 (34-55) | 41 (32-54) | 0,030 |
| Identificación de virus es importante para el diagnóstico | 40 (32-53) | 48 (35-57) | <0,001 |

Los valores son mediana (rango intercuartil) de edad, en años.

#: Test de Mann-Whitney.

¶: Calificada como importancia ≥ 8 en escala de 0-10.

FR: Frecuencia respiratoria.

Tabla S10. Coeficientes de correlación de las puntuaciones asignadas a cada signo/síntoma

| Signos/síntomas | Tos | Sibilancias | Crepitantes | Dificultad respiratoria | Aumento FR |
| --- | --- | --- | --- | --- | --- |
| Rinitis inicial | 0,405 | -0,046 | -0,008 | -0,004 | 0,020 |
|  | (p<0,001) | (p=0,098) | (p=0,767) | (p=0,895) | (p=0,481) |
| Tos |  | 0,061 | 0,039 | -0,003 | 0,022 |
|  |  | (p=0,028) | (p=0,161) | (p=0,927) | (p=0,436) |
| Sibilancias |  |  | 0,079 | 0,058 | 0,060 |
|  |  |  | (p=0,004) | (p=0,036) | (p=0,030) |
| Crepìtantes |  |  |  | 0,151 | 0,123 |
|  |  |  |  | (p<0,001) | (p<0,001) |
| Dificultad respiratoria |  |  |  |  | 0,768 |
|  |  |  |  |  | (p<0,001) |

Los valores son coeficientes de correlación de Spearman y su significación estadística.

FR: Frecuencia respiratoria

**CONSTRUCCIÓN DEL MODELO FACTORIAL**

Se planteó inicialmente con las siguientes 10 variables (modelo 1):

1) Rinitis inicial importante para el diagnóstico (puntuación ≥8 en escala 0-10).

2) Tos importante para el diagnóstico (puntuación ≥8 en escala 0-10).

3) Sibilancias importantes para el diagnóstico (puntuación ≥8 en escala 0-10).

4) Crepitantes importantes para el diagnóstico (puntuación ≥8 en escala 0-10).

5) Dificultad respiratoria importante para el diagnóstico (puntuación ≥8 en escala 0-10).

6) Aumento de frecuencia respiratoria importante para el diagnóstico (puntuación ≥8 en escala 0-10).

7) Es posible más de un episodio.

8) Es posible el diagnóstico si > 12 meses.

9) Es posible el diagnóstico en cualquier estación del año.

10) La identificación de virus es importante para el diagnóstico.

La extracción de factores se realizó mediante el método de componentes principales, extrayendo inicialmente todos los factores con autovalores > 1.

En la siguiente tabla se muestran las comunalidades iniciales y tras la extracción (las comunalidades son la proporción de la varianza de cada variable que es explicada por el modelo factorial).

Comunalidades (modelo 1)

|  | Inicial | Tras extracción factorial |
| --- | --- | --- |
| Rinitis inicial | 1,000 | 0,674 |
| Tos | 1,000 | 0,644 |
| Sibilancias | 1,000 | 0,695 |
| Crepitantes | 1,000 | 0,530 |
| Dificultad respiratoria | 1,000 | 0,833 |
| Aumento frecuencia respiratoria | 1,000 | 0,839 |
| Diagnóstico posible en > 12 meses | 1,000 | 0,585 |
| Posibles más de 1 episodio | 1,000 | 0,628 |
| Identificar virus es importante | 1,000 | 0,507 |
| Diagnóstico todo el año | 1,000 | 0,542 |

Con este modelo se extrajeron 5 factores que explicaban el 64,8% de la varianza:

Varianza total explicada (modelo 1).

| | Componente | Autovalores iniciales | | | Suma de extracciones de cargas cuadráticas | | | Sumas rotadas de cargas cuadráticas | | | | --- | --- | --- | --- | --- | --- | --- | --- | --- | --- | | Total | % de la varianza | % Acumulado | Total | % de la varianza | % Acumulado | Total | % de la varianza | % Acumulado | | 1 | 1,740 | 17,400 | 17,400 | 1,740 | 17,400 | 17,400 | 1,690 | 16,901 | 16,901 | | 2 | 1,369 | 13,693 | 31,094 | 1,369 | 13,693 | 31,094 | 1,297 | 12,967 | 29,869 | | 3 | 1,246 | 12,463 | 43,557 | 1,246 | 12,463 | 43,557 | 1,181 | 11,806 | 41,675 | | 4 | 1,084 | 10,842 | 54,398 | 1,084 | 10,842 | 54,398 | 1,167 | 11,670 | 53,345 | | 5 | 1,037 | 10,375 | 64,773 | 1,037 | 10,375 | 64,773 | 1,143 | 11,428 | 64,773 | | 6 | 0,903 | 9,034 | 73,807 |  |  |  |  |  |  | | 7 | 0,857 | 8,575 | 82,382 |  |  |  |  |  |  | | 8 | 0,765 | 7,652 | 90,034 |  |  |  |  |  |  | | 9 | 0,682 | 6,823 | 96,857 |  |  |  |  |  |  | | 10 | 0,314 | 3,143 | 100,000 |  |  |  |  |  |  | |
| --- | --- | --- | --- | --- | --- | --- | --- | --- | --- | --- | --- | --- | --- | --- | --- | --- | --- | --- | --- | --- | --- | --- | --- | --- | --- | --- | --- | --- | --- | --- | --- | --- | --- | --- | --- | --- | --- | --- | --- | --- | --- | --- | --- | --- | --- | --- | --- | --- | --- | --- | --- | --- | --- | --- | --- | --- | --- | --- | --- | --- | --- | --- | --- | --- | --- | --- | --- | --- | --- | --- | --- | --- | --- | --- | --- | --- | --- | --- | --- | --- | --- | --- | --- | --- | --- | --- | --- | --- | --- | --- | --- | --- | --- | --- | --- | --- | --- | --- | --- | --- | --- | --- | --- | --- | --- | --- | --- | --- | --- | --- | --- | --- | --- | --- | --- | --- | --- | --- | --- |

En la matriz de componentes se ve como tres variables (diagnóstico posible en >12 meses, identificación de virus y diagnóstico todo el año) tiene saturaciones iguales en dos factores, y casi todas por debajo de 0,5:

Matriz de componentes (modelo 1).

|  | Componentes | | | | |
| --- | --- | --- | --- | --- | --- |
| 1 | 2 | 3 | 4 | 5 |
| Rinitis inicial | 0,052 | 0,630 | 0,301 | -0,429 | 0,016 |
| Tos | 0,092 | 0,670 | 0,387 | -0,190 | 0,030 |
| Sibilancias | 0,149 | 0,100 | 0,400 | 0,705 | -0,077 |
| Crepitantes | 0,277 | -0,059 | 0,515 | 0,274 | -0,331 |
| Dificultad respiratoria | 0,893 | -0,087 | -0,084 | -0,081 | 0,124 |
| Aumento frecuencia respiratoria | 0,886 | -0,097 | -0,071 | -0,084 | 0,182 |
| Diagnóstico posible en > 12 meses | -0,172 | -0,206 | 0,504 | 0,066 | 0,504 |
| Posibles más de 1 episodio | -0,091 | 0,275 | -0,250 | 0,250 | 0,647 |
| Identificar virus es importante | 0,054 | 0,464 | -0,299 | 0,414 | 0,170 |
| Todo el año | -0,087 | -0,402 | 0,403 | -0,200 | 0,413 |

Con estos resultados, se decidió eliminar esas tres variables del modelo factorial, y se repitió el procedimiento con solo 7 variables (modelo 2).

Este modelo de 7 variables también era insatisfactorio, ya que producía un modelo con tres factores que solo explicaban el 59,3% de la varianza:

Varianza total explicada (modelo 2).

| Componente | Autovalores iniciales | | | Suma de extracciones de cargas cuadráticas | | | Sumas rotadas de cargas cuadráticas | | |
| --- | --- | --- | --- | --- | --- | --- | --- | --- | --- |
|  | Total | % de la varianza | % Acumulado | Total | % de la varianza | % Acumulado | Total | % de la varianza | % Acumulado |
| 1 | 1,728 | 24,680 | 24,680 | 1,728 | 24,680 | 24,680 | 1,685 | 24,072 | 24,072 |
| 2 | 1,306 | 18,654 | 43,335 | 1,306 | 18,654 | 43,335 | 1,301 | 18,586 | 42,659 |
| 3 | 1,120 | 16,007 | 59,342 | 1,120 | 16,007 | 59,342 | 1,168 | 16,683 | 59,342 |
| 4 | 0,999 | 14,269 | 73,610 |  |  |  |  |  |  |
| 5 | 0,846 | 12,083 | 85,693 |  |  |  |  |  |  |
| 6 | 0,687 | 9,813 | 95,506 |  |  |  |  |  |  |
| 7 | 0,315 | 4,494 | 100,000 |  |  |  |  |  |  |

Además, en este modelo la variable de diagnóstico posible en más de un episodio no saturaba en ninguno de los tres componentes:

Matriz de componentes (modelo 2).

|  | Componente | | |
| --- | --- | --- | --- |
| 1 | 2 | 3 |
| Rinitis inicial | 0,037 | 0,749 | -0,249 |
| Tos | 0,075 | 0,804 | -0,074 |
| Sibilancias | 0,159 | 0,191 | 0,655 |
| Crepitantes | 0,298 | 0,189 | 0,649 |
| Dificultad respiratoria | 0,895 | -0,094 | -0,170 |
| Aumento frecuencia respiratoria | 0,891 | -0,090 | -0,192 |
| Posibles más de 1 episodio | -0,107 | 0,094 | -0,369 |

Se decidió eliminar también esta variable y utilizar un modelo con seis variables (modelo 3).

Este modelo resultó más satisfactorio. Daba lugar a un modelo de tres factores pero que explicaban el 68,8% de la varianza:

Varianza total explicada (modelo 3).

| Componente | Autovalores iniciales | | | Suma de extracciones de cargas cuadráticas | | | Sumas rotadas de cargas cuadráticas | | |
| --- | --- | --- | --- | --- | --- | --- | --- | --- | --- |
| Total | % de la varianza | % Acumulado | Total | % de la varianza | % Acumulado | Total | % de la varianza | % Acumulado |
| 1 | 1,720 | 28,674 | 28,674 | 1,720 | 28,674 | 28,674 | 1,681 | 28,019 | 28,019 |
| 2 | 1,303 | 21,724 | 50,398 | 1,303 | 21,724 | 50,398 | 1,292 | 21,526 | 49,545 |
| 3 | 1,102 | 18,362 | 68,760 | 1,102 | 18,362 | 68,760 | 1,153 | 19,215 | 68,760 |
| 4 | 0,856 | 14,267 | 83,027 |  |  |  |  |  |  |
| 5 | 0,697 | 11,611 | 94,638 |  |  |  |  |  |  |
| 6 | 0,322 | 5,362 | 100,000 |  |  |  |  |  |  |

El modelo factorial final cumplía en el límite el criterio de adecuación de la muestra de Kaiser-Meyer-Olkin (KMO=0,508), pero se rechazaba la hipótesis de matriz identidad mediante la prueba de esfericidad de Bartlett (p<0,001).

La matriz de componentes identificaba claramente las variables que saturaban en cada factor:

Matriz de componentes (modelo 3).

|  | Componente | | |
| --- | --- | --- | --- |
| 1 | 2 | 3 |
| Rinitis inicial | 0,052 | **0,753** | -0,322 |
| Tos | 0,093 | **0,799** | -0,069 |
| Sibilancias | 0,159 | 0,188 | **0,735** |
| Crepitantes | 0,301 | 0,194 | **0,634** |
| Dificultad respiratoria | **0,892** | -0,111 | -0,159 |
| Aumento frecuencia respiratoria | **0,892** | -0,115 | -0,160 |

Para facilitar su interpretación, el modelo factorial se rotó mediante procedimiento Varimax. Los tres factores identificados pueden denominarse: disnea, catarral y auscultación.

Matriz de componentes rotada (modelo 3).

|  | Componente | | |
| --- | --- | --- | --- |
| 1  “Disnea” | 2  “Catarral” | 3  “Auscultación” |
| Rinitis inicial | 0,015 | **0,813** | -0,107 |
| Tos | -0,008 | **0,793** | 0,151 |
| Sibilancias | -0,038 | -0,004 | **0,775** |
| Crepitantes | 0,122 | 0,040 | **0,717** |
| Dificultad respiratoria | **0,912** | 0,006 | 0,050 |
| Aumento frecuencia respiratoria | **0,913** | 0,003 | 0,048 |
